# Supplementary material for: Facile Construction of Porous ZnMn2O4 Hollow Micro-Rods as Advanced Anode Material for Lithium Ion Batteries
Source: MDPI journal article supplement (doi:10.3390/nano13030512), 2023-01-27
Supplement: s1 [file s1]

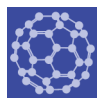

## Supplementary Materials

# Facile Construction of Porous $\text{ZnMn}_2\text{O}_4$ Hollow Micro-Rods as Advanced Anode Material for Lithium Ion Batteries

Yuyan Wang <sup>†</sup>, Senyang Xu <sup>†</sup>, Yamin Zhang, Linrui Hou <sup>\*</sup> and Changzhou Yuan <sup>\*</sup>

School of Materials Science &amp; Engineering, University of Jinan, Jinan 250022, China

<sup>\*</sup> Correspondence: mse\_houlr@ujn.edu.cn (L.H.); mse\_yuancz@ujn.edu.cn (C.Y.)<sup>†</sup> These authors contributed equally to this work.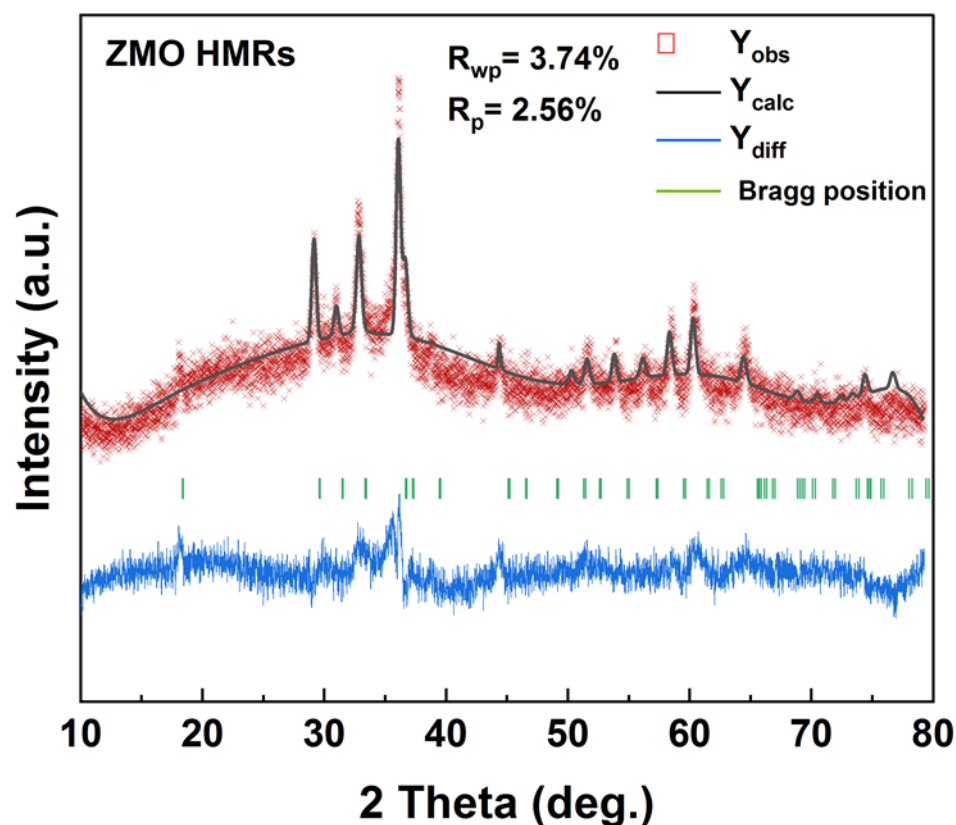Figure S1. Rietveld-refined XRD pattern of  $\text{ZnMn}_2\text{O}_4$ .

Table S1. Rietveld refinement results of XRD data for ZMO HMRs samples.

|          | a (Å)  | b (Å)  | c (Å)  | volume (Å <sup>3</sup> ) | R <sub>wp</sub> (%) | R <sub>p</sub> (%) | CHI <sup>2</sup> |
|----------|--------|--------|--------|--------------------------|---------------------|--------------------|------------------|
| ZMO HMRs | 5.6533 | 5.6533 | 8.9989 | 287.612                  | 3.74                | 2.56               | 2.882            |

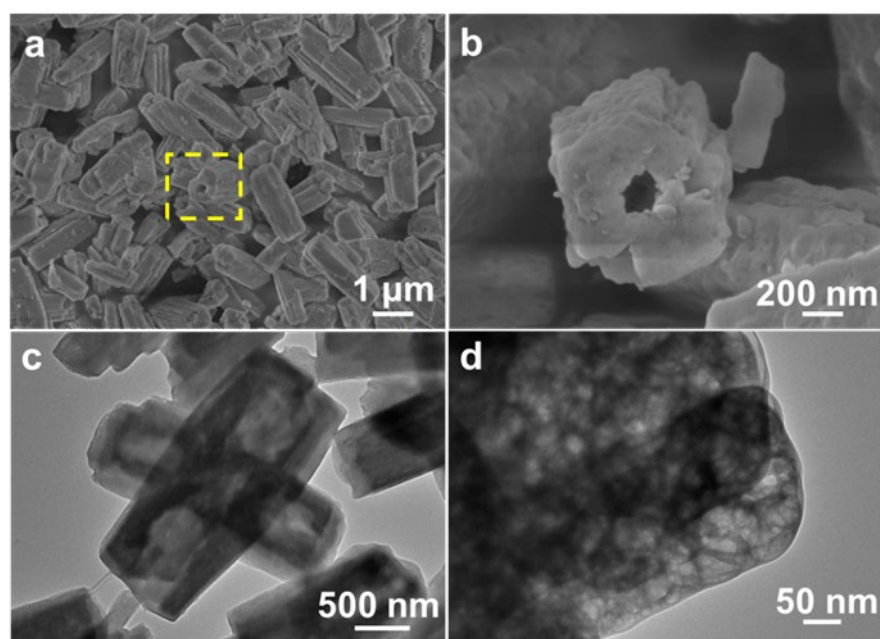

Figure S2. (a, b) FESEM and (c, d) TEM images for the  $\text{ZnC}_2\text{O}_4\cdot\text{MnC}_2\text{O}_4\cdot 2\text{H}_2\text{O}$  precursor.

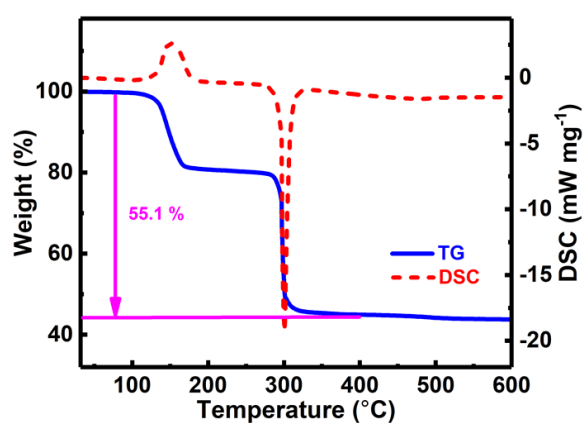

Figure S3. TG-DSC curves of the  $\text{ZnC}_2\text{O}_4\cdot\text{MnC}_2\text{O}_4\cdot 2\text{H}_2\text{O}$  precursor.

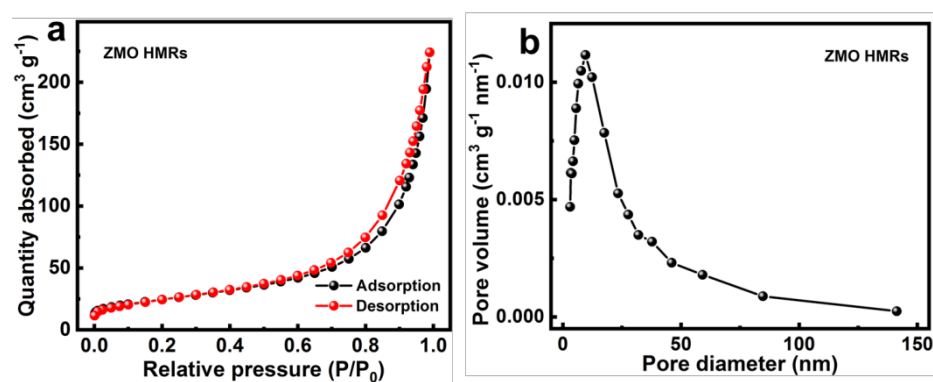

Figure S4. (a) Nitrogen adsorption/desorption isotherms and (b) pore-size distribution plot of the ZMO HMRs.

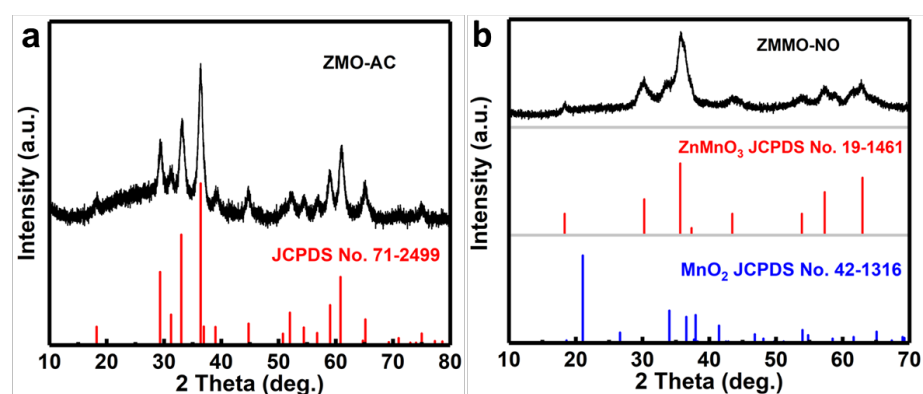

Figure S5. The XRD pattern of ZMO-AC (a) and (b) ZMMO-NO.

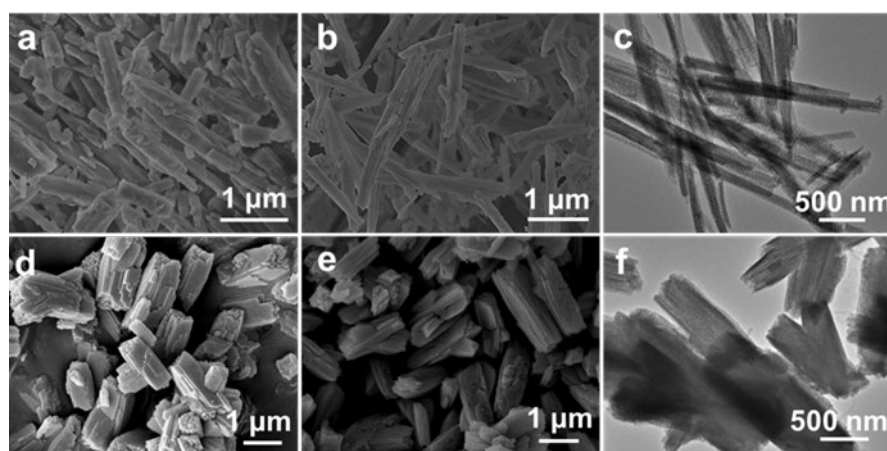

Figure S6. FESEM images of the ZMO-AC: (a) precursor, (b) after annealing, (c) TEM images for after annealing. ZMO-NO: (d) precursor, (e) after annealing, (f) TEM images for after annealing.

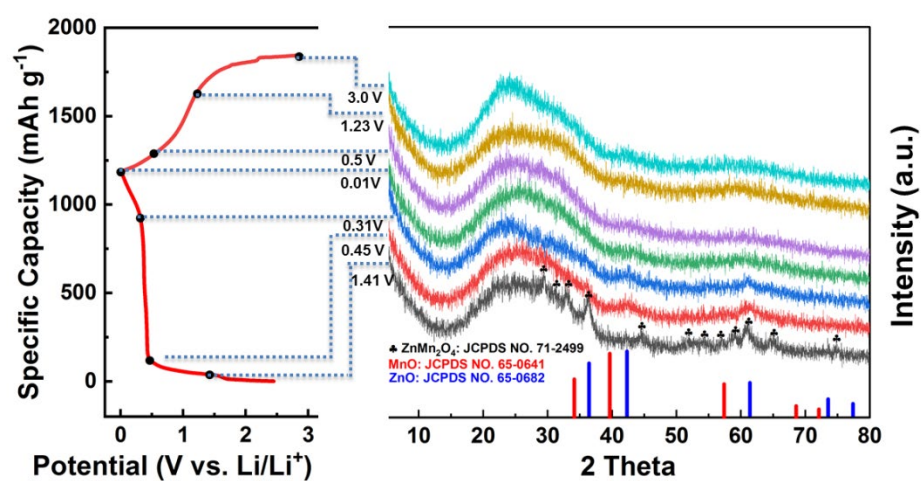

Figure S7. Typical initial discharge-charge voltage profiles of the ZMO HMRs electrode and corresponding ex-situ XRD analysis at different selected voltages.

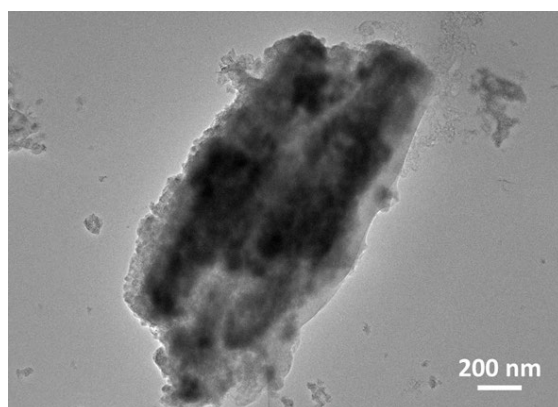

**Figure S8.** FESEM image of the ZMO-HMRs cycled over 250 cycles.

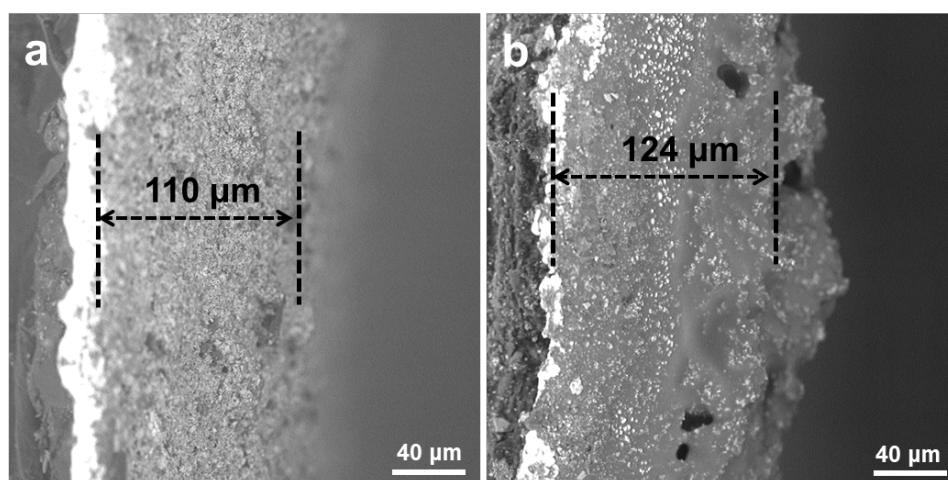

**Figure S9.** Cross-section SEM images of (a) original pristine ZMO HMRs electrode, (b) pristine ZMO HMRs electrode after 250 cycles at  $0.5 \text{ A g}^{-1}$ .

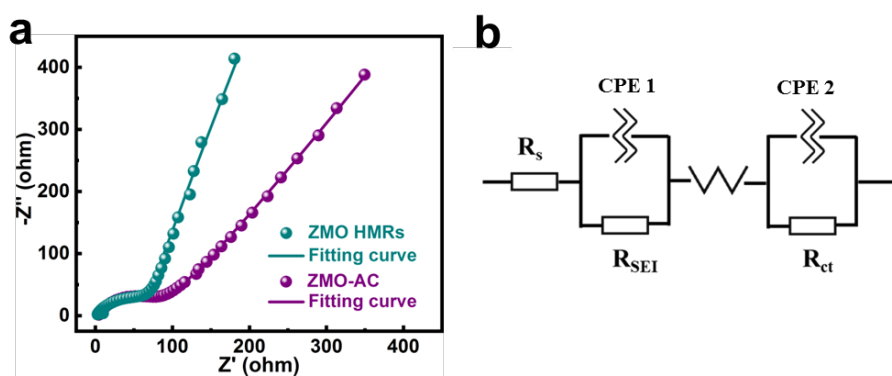

**Figure S10.** (a) EIS spectra and (b) corresponding equivalent circuit of ZMO HMRs and ZMO-AC.

**Table S2.** Corresponding EIS fitted data for the ZMO HMRs and ZMO-AC.

| Electrode | $R_s$ ( $\Omega$ ) | CPE 1 ( $\Omega$ ) | $R_{SEI}$ ( $\Omega$ ) | $W$ ( $\Omega$ ) | CPE 2 ( $\Omega$ ) |
|-----------|--------------------|--------------------|------------------------|------------------|--------------------|
| ZMO HMRs  | 1.616              | 0.6922             | 97.56                  | 160.0            | 0.7896             |
| ZMO-AC    | 3.183              | 0.6925             | 106.4                  | 206.2            | 0.6719             |
